# Supplementary material for: Macromolecular thiolysis of oxiranes: end-group modification of RAFT prepared homopolymers
Source: Royal Society of Chemistry journal article supplement (doi:10.1039/c1py00046b), 2011-01-01

## Supporting Information

### Macromolecular Thiolyis of Oxiranes: End-Group Modification of RAFT Prepared Homopolymers

M. Alyse Harvison, Thomas P. Davis and Andrew B. Lowe

Submitted to *Polymer Chemistry*

Figure S1. FTIR spectra of PDEAM-S(C=S)Ph (blue line) and PDEAM after treatment with EP7 in the presence of NaBH<sub>4</sub> (black line)

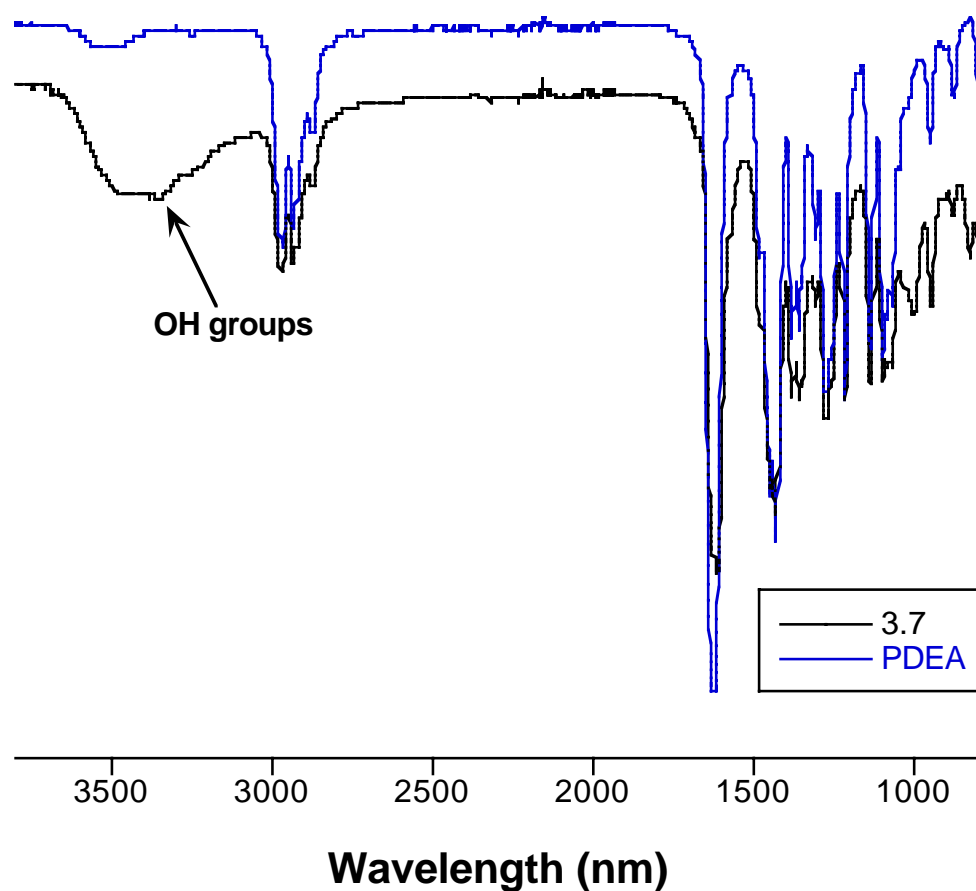

Supplement: c1py00046b.pdf [file c1py00046b.pdf]
